# Supplementary material
Source: publisher figshare collection journal article supplement (https://acs.figshare.com/ndownloader/files/4060624)
Supplement: Supplementary file 1 [file 4060624]

 
data_chloro_methoxy_trifluoroethyl_pyrazinamine

_vrf_PLAT027_chloro_methoxy_trifluoroethyl_pyrazinamine
;
PROBLEM: _diffrn_reflns_theta_full (too) Low  60.00
RESPONSE: This experiment was done using Cu radiation: 
full set up to theta=60.00 with Cu radiation proved to
be in great number of cases quite sufficient set 
of data for unambiguous determination of
all structural details; in this case it was the simple question about
regioisomerism, full set up to theta=60.00
is sufficient for this purpose.

;


_audit_creation_method            SHELXL-97 
_chemical_name_systematic 
; 
 ? 
; 
_chemical_name_common             ? 
_chemical_melting_point           ? 
_chemical_formula_moiety          ? 
_chemical_formula_sum 
 'C7 H7 Cl F3 N3 O' 
_chemical_formula_weight          241.61 
  
loop_ 
 _atom_type_symbol 
 _atom_type_description 
 _atom_type_scat_dispersion_real 
 _atom_type_scat_dispersion_imag 
 _atom_type_scat_source 
 'C'  'C'   0.0181   0.0091 
 'International Tables Vol C Tables 4.2.6.8 and 6.1.1.4' 
 'H'  'H'   0.0000   0.0000 
 'International Tables Vol C Tables 4.2.6.8 and 6.1.1.4' 
 'Cl'  'Cl'   0.3639   0.7018 
 'International Tables Vol C Tables 4.2.6.8 and 6.1.1.4' 
 'F'  'F'   0.0727   0.0534 
 'International Tables Vol C Tables 4.2.6.8 and 6.1.1.4' 
 'N'  'N'   0.0311   0.0180 
 'International Tables Vol C Tables 4.2.6.8 and 6.1.1.4' 
 'O'  'O'   0.0492   0.0322 
 'International Tables Vol C Tables 4.2.6.8 and 6.1.1.4' 
  
_symmetry_cell_setting            Orthorhombic 
_symmetry_space_group_name_H-M    Pbca 
  
loop_ 
 _symmetry_equiv_pos_as_xyz 
 'x, y, z' 
 'x+1/2, -y+1/2, -z' 
 '-x, y+1/2, -z+1/2' 
 '-x+1/2, -y, z+1/2' 
 '-x, -y, -z' 
 '-x-1/2, y-1/2, z' 
 'x, -y-1/2, z-1/2' 
 'x-1/2, y, -z-1/2' 
  
_cell_length_a                    16.3661(6) 
_cell_length_b                    6.7959(2) 
_cell_length_c                    33.9544(12) 
_cell_angle_alpha                 90.00 
_cell_angle_beta                  90.00 
_cell_angle_gamma                 90.00 
_cell_volume                      3776.5(2) 
_cell_formula_units_Z             16 
_cell_measurement_temperature     90(2) 
_cell_measurement_reflns_used     7832 
_cell_measurement_theta_min       3.75 
_cell_measurement_theta_max       68.14 
  
_exptl_crystal_description        Needle 
_exptl_crystal_colour             Colorless 
_exptl_crystal_size_max           0.15 
_exptl_crystal_size_mid           0.11 
_exptl_crystal_size_min           0.08 
_exptl_crystal_density_meas       'not measured' 
_exptl_crystal_density_diffrn     1.700 
_exptl_crystal_density_method     'not measured' 
_exptl_crystal_F_000              1952 
_exptl_absorpt_coefficient_mu     3.894 
_exptl_absorpt_correction_type    multi-scan
_exptl_absorpt_correction_T_min   0.5927 
_exptl_absorpt_correction_T_max   0.7458 
_exptl_absorpt_process_details    SADASB 
  
_exptl_special_details 
; 
 ? 
; 
  
_diffrn_ambient_temperature       90(2) 
_diffrn_radiation_wavelength      1.54178 
_diffrn_radiation_type            CuK\a 
_diffrn_radiation_source          'fine-focus sealed tube' 
_diffrn_radiation_monochromator   graphite 
_diffrn_measurement_device_type   'Bruker APEX-II CCD' 
_diffrn_measurement_method        '\f and \w scans'  
_diffrn_reflns_number             16261 
_diffrn_reflns_av_R_equivalents   0.0405 
_diffrn_reflns_av_sigmaI/netI     0.0307 
_diffrn_reflns_limit_h_min        -15 
_diffrn_reflns_limit_h_max        19 
_diffrn_reflns_limit_k_min        -8 
_diffrn_reflns_limit_k_max        7 
_diffrn_reflns_limit_l_min        -40 
_diffrn_reflns_limit_l_max        40 
_diffrn_reflns_theta_min          3.75 
_diffrn_reflns_theta_max          68.33 
_reflns_number_total              3394 
_reflns_number_gt                 2950 
_reflns_threshold_expression      >2sigma(I) 
  
_computing_data_collection        'Bruker APEX2' 
_computing_cell_refinement        'Bruker SAINT' 
_computing_data_reduction         'Bruker SAINT' 
_computing_structure_solution     'SHELXS-97 (Sheldrick, 2008)' 
_computing_structure_refinement   'SHELXL-97 (Sheldrick, 2008)' 
_computing_molecular_graphics     'Bruker SHELXTL' 
_computing_publication_material   'Bruker SHELXTL' 
  
_refine_special_details 
; 
 Refinement of F^2^ against ALL reflections.  The weighted R-factor wR and 
 goodness of fit S are based on F^2^, conventional R-factors R are based 
 on F, with F set to zero for negative F^2^. The threshold expression of 
 F^2^ > 2sigma(F^2^) is used only for calculating R-factors(gt) etc. and is 
 not relevant to the choice of reflections for refinement.  R-factors based 
 on F^2^ are statistically about twice as large as those based on F, and R- 
 factors based on ALL data will be even larger. 
; 
  
_refine_ls_structure_factor_coef  Fsqd 
_refine_ls_matrix_type            full 
_refine_ls_weighting_scheme       calc 
_refine_ls_weighting_details 
 'calc w=1/[\s^2^(Fo^2^)+(0.0379P)^2^+1.6004P] where P=(Fo^2^+2Fc^2^)/3' 
_atom_sites_solution_primary      direct 
_atom_sites_solution_secondary    difmap 
_atom_sites_solution_hydrogens    geom 
_refine_ls_hydrogen_treatment     constr 
_refine_ls_extinction_method      SHELXL 
_refine_ls_extinction_coef        0.00019(3) 
_refine_ls_extinction_expression 
 'Fc^*^=kFc[1+0.001xFc^2^\l^3^/sin(2\q)]^-1/4^' 
_refine_ls_number_reflns          3394 
_refine_ls_number_parameters      274 
_refine_ls_number_restraints      0 
_refine_ls_R_factor_all           0.0368 
_refine_ls_R_factor_gt            0.0300 
_refine_ls_wR_factor_ref          0.0760 
_refine_ls_wR_factor_gt           0.0723 
_refine_ls_goodness_of_fit_ref    1.028 
_refine_ls_restrained_S_all       1.028 
_refine_ls_shift/su_max           0.001 
_refine_ls_shift/su_mean          0.000 
  
loop_ 
 _atom_site_label 
 _atom_site_type_symbol 
 _atom_site_fract_x 
 _atom_site_fract_y 
 _atom_site_fract_z 
 _atom_site_U_iso_or_equiv 
 _atom_site_adp_type 
 _atom_site_occupancy 
 _atom_site_symmetry_multiplicity 
 _atom_site_calc_flag 
 _atom_site_refinement_flags 
 _atom_site_disorder_assembly 
 _atom_site_disorder_group 
Cl1 Cl 0.94588(2) 0.18874(6) 0.735726(12) 0.02097(12) Uani 1 1 d . . . 
F1 F 0.53993(6) 0.31149(17) 0.66775(3) 0.0253(2) Uani 1 1 d . . . 
F2 F 0.61570(7) 0.19637(16) 0.62118(3) 0.0225(2) Uani 1 1 d . . . 
F3 F 0.66150(7) 0.42312(16) 0.65959(3) 0.0250(2) Uani 1 1 d . . . 
O1 O 0.62626(7) 0.21301(19) 0.80352(3) 0.0195(3) Uani 1 1 d . . . 
N1 N 0.78639(9) 0.1778(2) 0.73283(4) 0.0152(3) Uani 1 1 d . . . 
N2 N 0.76623(9) 0.2275(2) 0.81401(4) 0.0184(3) Uani 1 1 d . . . 
N3 N 0.64492(8) 0.1611(2) 0.72623(4) 0.0170(3) Uani 1 1 d . . . 
H3N H 0.5968 0.1845 0.7368 0.020 Uiso 1 1 calc R . . 
C1 C 0.84953(10) 0.1961(2) 0.75770(5) 0.0165(3) Uani 1 1 d . . . 
C2 C 0.84211(10) 0.2204(3) 0.79739(5) 0.0185(3) Uani 1 1 d . . . 
H2 H 0.8895 0.2324 0.8134 0.022 Uiso 1 1 calc R . . 
C3 C 0.70392(10) 0.2092(2) 0.79052(5) 0.0152(3) Uani 1 1 d . . . 
C4 C 0.71272(10) 0.1829(2) 0.74883(5) 0.0146(3) Uani 1 1 d . . . 
C5 C 0.61532(12) 0.2295(3) 0.84559(5) 0.0292(4) Uani 1 1 d . . . 
H5A H 0.6424 0.1188 0.8587 0.044 Uiso 1 1 calc R . . 
H5B H 0.5569 0.2274 0.8518 0.044 Uiso 1 1 calc R . . 
H5C H 0.6392 0.3534 0.8548 0.044 Uiso 1 1 calc R . . 
C6 C 0.64875(10) 0.1013(3) 0.68560(5) 0.0181(3) Uani 1 1 d . . . 
H6A H 0.6162 -0.0201 0.6820 0.022 Uiso 1 1 calc R . . 
H6B H 0.7061 0.0712 0.6786 0.022 Uiso 1 1 calc R . . 
C7 C 0.61676(10) 0.2587(3) 0.65875(5) 0.0175(3) Uani 1 1 d . . . 
Cl1' Cl 0.94166(3) 0.26769(6) 0.915316(12) 0.02279(12) Uani 1 1 d . . . 
F1' F 0.80793(6) 0.20385(16) 1.10846(3) 0.0242(2) Uani 1 1 d . . . 
F2' F 0.93306(6) 0.30451(17) 1.10560(3) 0.0254(2) Uani 1 1 d . . . 
F3' F 0.88748(6) 0.09839(15) 1.06244(3) 0.0212(2) Uani 1 1 d . . . 
O1' O 0.63517(7) 0.30716(18) 0.99532(3) 0.0177(3) Uani 1 1 d . . . 
N1' N 0.84989(9) 0.3183(2) 0.97772(4) 0.0159(3) Uani 1 1 d . . . 
N2' N 0.70341(9) 0.2611(2) 0.93599(4) 0.0167(3) Uani 1 1 d . . . 
N3' N 0.77215(9) 0.3755(2) 1.03439(4) 0.0172(3) Uani 1 1 d . . . 
H3N' H 0.7238 0.3721 1.0457 0.021 Uiso 1 1 calc R . . 
C1' C 0.84742(11) 0.2798(2) 0.93892(5) 0.0167(3) Uani 1 1 d . . . 
C2' C 0.77737(11) 0.2531(2) 0.91766(5) 0.0174(3) Uani 1 1 d . . . 
H2' H 0.7803 0.2290 0.8901 0.021 Uiso 1 1 calc R . . 
C3' C 0.70410(10) 0.2971(2) 0.97365(5) 0.0146(3) Uani 1 1 d . . . 
C4' C 0.77773(10) 0.3306(2) 0.99533(5) 0.0149(3) Uani 1 1 d . . . 
C5' C 0.55902(10) 0.2825(3) 0.97437(5) 0.0204(4) Uani 1 1 d . . . 
H5A' H 0.5538 0.3858 0.9544 0.031 Uiso 1 1 calc R . . 
H5B' H 0.5134 0.2917 0.9930 0.031 Uiso 1 1 calc R . . 
H5C' H 0.5583 0.1533 0.9616 0.031 Uiso 1 1 calc R . . 
C7' C 0.84221(11) 0.4282(3) 1.05785(5) 0.0179(3) Uani 1 1 d . . . 
H7A' H 0.8287 0.5434 1.0745 0.021 Uiso 1 1 calc R . . 
H7B' H 0.8880 0.4653 1.0403 0.021 Uiso 1 1 calc R . . 
C8' C 0.86782(10) 0.2591(3) 1.08369(5) 0.0178(3) Uani 1 1 d . . . 
  
loop_ 
 _atom_site_aniso_label 
 _atom_site_aniso_U_11 
 _atom_site_aniso_U_22 
 _atom_site_aniso_U_33 
 _atom_site_aniso_U_23 
 _atom_site_aniso_U_13 
 _atom_site_aniso_U_12 
Cl1 0.01031(19) 0.0305(2) 0.0221(2) -0.00069(15) 0.00022(14) 0.00131(15) 
F1 0.0139(5) 0.0410(6) 0.0210(5) 0.0005(4) -0.0016(4) 0.0070(4) 
F2 0.0258(5) 0.0309(6) 0.0109(4) -0.0006(4) -0.0031(4) 0.0003(4) 
F3 0.0281(6) 0.0253(5) 0.0217(5) 0.0007(4) -0.0021(4) -0.0085(4) 
O1 0.0135(6) 0.0323(7) 0.0128(6) 0.0001(5) 0.0010(4) -0.0012(5) 
N1 0.0130(7) 0.0183(7) 0.0144(6) -0.0004(5) -0.0003(5) 0.0013(5) 
N2 0.0168(7) 0.0237(8) 0.0146(6) 0.0003(6) -0.0019(5) -0.0010(6) 
N3 0.0108(6) 0.0272(8) 0.0130(6) -0.0008(6) -0.0007(5) 0.0009(5) 
C1 0.0115(8) 0.0176(8) 0.0203(8) 0.0006(6) -0.0005(6) -0.0002(6) 
C2 0.0141(8) 0.0233(9) 0.0183(8) 0.0002(7) -0.0041(6) -0.0008(7) 
C3 0.0149(8) 0.0167(8) 0.0140(8) 0.0005(6) 0.0000(6) -0.0009(6) 
C4 0.0145(8) 0.0153(7) 0.0139(7) 0.0022(6) -0.0013(6) 0.0000(6) 
C5 0.0228(9) 0.0521(13) 0.0126(8) -0.0011(8) 0.0044(7) -0.0024(9) 
C6 0.0163(8) 0.0237(9) 0.0143(8) -0.0016(7) -0.0031(6) 0.0003(7) 
C7 0.0132(8) 0.0255(9) 0.0138(8) -0.0026(7) -0.0007(6) -0.0016(7) 
Cl1' 0.0177(2) 0.0297(2) 0.0209(2) -0.00017(16) 0.00741(15) 0.00019(16) 
F1' 0.0201(5) 0.0354(6) 0.0171(5) 0.0057(4) 0.0044(4) 0.0008(4) 
F2' 0.0182(5) 0.0379(6) 0.0201(5) -0.0010(4) -0.0085(4) -0.0004(4) 
F3' 0.0194(5) 0.0241(5) 0.0202(5) -0.0016(4) -0.0002(4) 0.0029(4) 
O1' 0.0125(6) 0.0255(6) 0.0152(5) 0.0000(5) -0.0011(4) 0.0004(5) 
N1' 0.0151(7) 0.0159(7) 0.0167(7) 0.0024(5) 0.0004(5) -0.0001(5) 
N2' 0.0179(7) 0.0170(7) 0.0153(7) 0.0014(5) -0.0018(5) -0.0003(6) 
N3' 0.0137(7) 0.0245(8) 0.0135(6) -0.0010(6) -0.0009(5) 0.0008(6) 
C1' 0.0166(8) 0.0169(8) 0.0166(8) 0.0015(6) 0.0030(6) 0.0005(6) 
C2' 0.0216(9) 0.0174(8) 0.0132(7) -0.0007(6) 0.0009(6) 0.0008(7) 
C3' 0.0148(8) 0.0134(7) 0.0156(7) 0.0017(6) 0.0003(6) 0.0009(6) 
C4' 0.0170(8) 0.0136(7) 0.0142(7) 0.0021(6) -0.0009(6) 0.0010(6) 
C5' 0.0117(8) 0.0259(9) 0.0235(8) 0.0000(7) -0.0029(6) -0.0004(7) 
C7' 0.0178(8) 0.0213(8) 0.0145(7) -0.0015(6) -0.0037(6) -0.0014(7) 
C8' 0.0133(8) 0.0263(9) 0.0138(7) -0.0011(7) -0.0008(6) -0.0010(6) 
  
_geom_special_details 
; 
 All esds (except the esd in the dihedral angle between two l.s. planes) 
 are estimated using the full covariance matrix.  The cell esds are taken 
 into account individually in the estimation of esds in distances, angles 
 and torsion angles; correlations between esds in cell parameters are only 
 used when they are defined by crystal symmetry.  An approximate (isotropic) 
 treatment of cell esds is used for estimating esds involving l.s. planes. 
; 
  
loop_ 
 _geom_bond_atom_site_label_1 
 _geom_bond_atom_site_label_2 
 _geom_bond_distance 
 _geom_bond_site_symmetry_2 
 _geom_bond_publ_flag 
Cl1 C1 1.7451(17) . ? 
F1 C7 1.343(2) . ? 
F2 C7 1.3442(19) . ? 
F3 C7 1.336(2) . ? 
O1 C3 1.346(2) . ? 
O1 C5 1.444(2) . ? 
N1 C4 1.323(2) . ? 
N1 C1 1.340(2) . ? 
N2 C3 1.301(2) . ? 
N2 C2 1.365(2) . ? 
N3 C4 1.357(2) . ? 
N3 C6 1.440(2) . ? 
N3 H3N 0.8800 . ? 
C1 C2 1.363(2) . ? 
C2 H2 0.9500 . ? 
C3 C4 1.434(2) . ? 
C5 H5A 0.9800 . ? 
C5 H5B 0.9800 . ? 
C5 H5C 0.9800 . ? 
C6 C7 1.500(2) . ? 
C6 H6A 0.9900 . ? 
C6 H6B 0.9900 . ? 
Cl1' C1' 1.7401(17) . ? 
F1' C8' 1.345(2) . ? 
F2' C8' 1.338(2) . ? 
F3' C8' 1.348(2) . ? 
O1' C3' 1.348(2) . ? 
O1' C5' 1.445(2) . ? 
N1' C4' 1.326(2) . ? 
N1' C1' 1.344(2) . ? 
N2' C3' 1.302(2) . ? 
N2' C2' 1.362(2) . ? 
N3' C4' 1.364(2) . ? 
N3' C7' 1.442(2) . ? 
N3' H3N' 0.8800 . ? 
C1' C2' 1.367(3) . ? 
C2' H2' 0.9500 . ? 
C3' C4' 1.430(2) . ? 
C5' H5A' 0.9800 . ? 
C5' H5B' 0.9800 . ? 
C5' H5C' 0.9800 . ? 
C7' C8' 1.505(2) . ? 
C7' H7A' 0.9900 . ? 
C7' H7B' 0.9900 . ? 
  
loop_ 
 _geom_angle_atom_site_label_1 
 _geom_angle_atom_site_label_2 
 _geom_angle_atom_site_label_3 
 _geom_angle 
 _geom_angle_site_symmetry_1 
 _geom_angle_site_symmetry_3 
 _geom_angle_publ_flag 
C3 O1 C5 116.30(13) . . ? 
C4 N1 C1 116.21(14) . . ? 
C3 N2 C2 117.16(15) . . ? 
C4 N3 C6 122.48(14) . . ? 
C4 N3 H3N 118.8 . . ? 
C6 N3 H3N 118.8 . . ? 
N1 C1 C2 124.43(15) . . ? 
N1 C1 Cl1 115.13(13) . . ? 
C2 C1 Cl1 120.44(13) . . ? 
C1 C2 N2 119.61(15) . . ? 
C1 C2 H2 120.2 . . ? 
N2 C2 H2 120.2 . . ? 
N2 C3 O1 122.51(15) . . ? 
N2 C3 C4 122.59(15) . . ? 
O1 C3 C4 114.90(14) . . ? 
N1 C4 N3 120.68(15) . . ? 
N1 C4 C3 120.01(15) . . ? 
N3 C4 C3 119.31(15) . . ? 
O1 C5 H5A 109.5 . . ? 
O1 C5 H5B 109.5 . . ? 
H5A C5 H5B 109.5 . . ? 
O1 C5 H5C 109.5 . . ? 
H5A C5 H5C 109.5 . . ? 
H5B C5 H5C 109.5 . . ? 
N3 C6 C7 111.44(14) . . ? 
N3 C6 H6A 109.3 . . ? 
C7 C6 H6A 109.3 . . ? 
N3 C6 H6B 109.3 . . ? 
C7 C6 H6B 109.3 . . ? 
H6A C6 H6B 108.0 . . ? 
F3 C7 F1 106.57(14) . . ? 
F3 C7 F2 106.93(13) . . ? 
F1 C7 F2 106.74(13) . . ? 
F3 C7 C6 113.08(14) . . ? 
F1 C7 C6 112.27(14) . . ? 
F2 C7 C6 110.87(14) . . ? 
C3' O1' C5' 116.56(13) . . ? 
C4' N1' C1' 115.30(15) . . ? 
C3' N2' C2' 116.64(15) . . ? 
C4' N3' C7' 122.66(14) . . ? 
C4' N3' H3N' 118.7 . . ? 
C7' N3' H3N' 118.7 . . ? 
N1' C1' C2' 124.66(16) . . ? 
N1' C1' Cl1' 115.72(13) . . ? 
C2' C1' Cl1' 119.61(13) . . ? 
N2' C2' C1' 119.93(15) . . ? 
N2' C2' H2' 120.0 . . ? 
C1' C2' H2' 120.0 . . ? 
N2' C3' O1' 122.55(15) . . ? 
N2' C3' C4' 122.86(15) . . ? 
O1' C3' C4' 114.59(14) . . ? 
N1' C4' N3' 120.81(15) . . ? 
N1' C4' C3' 120.55(15) . . ? 
N3' C4' C3' 118.65(15) . . ? 
O1' C5' H5A' 109.5 . . ? 
O1' C5' H5B' 109.5 . . ? 
H5A' C5' H5B' 109.5 . . ? 
O1' C5' H5C' 109.5 . . ? 
H5A' C5' H5C' 109.5 . . ? 
H5B' C5' H5C' 109.5 . . ? 
N3' C7' C8' 110.71(14) . . ? 
N3' C7' H7A' 109.5 . . ? 
C8' C7' H7A' 109.5 . . ? 
N3' C7' H7B' 109.5 . . ? 
C8' C7' H7B' 109.5 . . ? 
H7A' C7' H7B' 108.1 . . ? 
F2' C8' F1' 107.35(13) . . ? 
F2' C8' F3' 107.11(14) . . ? 
F1' C8' F3' 106.43(14) . . ? 
F2' C8' C7' 111.71(15) . . ? 
F1' C8' C7' 112.00(14) . . ? 
F3' C8' C7' 111.91(14) . . ? 
  
loop_ 
 _geom_hbond_atom_site_label_D 
 _geom_hbond_atom_site_label_H 
 _geom_hbond_atom_site_label_A 
 _geom_hbond_distance_DH 
 _geom_hbond_distance_HA 
 _geom_hbond_distance_DA 
 _geom_hbond_angle_DHA 
 _geom_hbond_site_symmetry_A 
N3 H3N Cl1  0.88 2.64 3.5093(15) 169.5 8_557 
N3' H3N' F3'  0.88 2.45 3.1665(17) 138.8 6_765 
  
_diffrn_measured_fraction_theta_max    0.980 
_diffrn_reflns_theta_full              60.00 
_diffrn_measured_fraction_theta_full   0.988 
_refine_diff_density_max    0.260 
_refine_diff_density_min   -0.314 
_refine_diff_density_rms    0.052 


  

#===END


  
data_chloro_trifluoroethylamino_pyrazinecarbonitrile
  
_audit_creation_method            SHELXL-97 
_chemical_name_systematic 
; 
 ? 
; 
_chemical_name_common             ? 
_chemical_melting_point           ? 
_chemical_formula_moiety          ? 
_chemical_formula_sum 
 'C7 H4 Cl F3 N4' 
_chemical_formula_weight          236.59 
  
loop_ 
 _atom_type_symbol 
 _atom_type_description 
 _atom_type_scat_dispersion_real 
 _atom_type_scat_dispersion_imag 
 _atom_type_scat_source 
 'C'  'C'   0.0033   0.0016 
 'International Tables Vol C Tables 4.2.6.8 and 6.1.1.4' 
 'H'  'H'   0.0000   0.0000 
 'International Tables Vol C Tables 4.2.6.8 and 6.1.1.4' 
 'N'  'N'   0.0061   0.0033 
 'International Tables Vol C Tables 4.2.6.8 and 6.1.1.4' 
 'F'  'F'   0.0171   0.0103 
 'International Tables Vol C Tables 4.2.6.8 and 6.1.1.4' 
 'Cl'  'Cl'   0.1484   0.1585 
 'International Tables Vol C Tables 4.2.6.8 and 6.1.1.4' 
  
_symmetry_cell_setting            Monoclinic 
_symmetry_space_group_name_H-M    P2(1)/n 
  
loop_ 
 _symmetry_equiv_pos_as_xyz 
 'x, y, z' 
 '-x+1/2, y+1/2, -z+1/2' 
 '-x, -y, -z' 
 'x-1/2, -y-1/2, z-1/2' 
  
_cell_length_a                    9.531(2) 
_cell_length_b                    8.997(2) 
_cell_length_c                    11.626(3) 
_cell_angle_alpha                 90.00 
_cell_angle_beta                  109.605(10) 
_cell_angle_gamma                 90.00 
_cell_volume                      939.2(4) 
_cell_formula_units_Z             4 
_cell_measurement_temperature     100(2) 
_cell_measurement_reflns_used     3370 
_cell_measurement_theta_min       2.93 
_cell_measurement_theta_max       24.98 
  
_exptl_crystal_description        plate
_exptl_crystal_colour             colorless 
_exptl_crystal_size_max           0.33 
_exptl_crystal_size_mid           0.28 
_exptl_crystal_size_min           0.08 
_exptl_crystal_density_meas       ? 
_exptl_crystal_density_diffrn     1.673 
_exptl_crystal_density_method     'not measured' 
_exptl_crystal_F_000              472 
_exptl_absorpt_coefficient_mu     0.423 
_exptl_absorpt_correction_type    multi-scan 
_exptl_absorpt_correction_T_min   0.844 
_exptl_absorpt_correction_T_max   0.914
_exptl_absorpt_process_details    sadabs 
  
_exptl_special_details 
; 
 ? 
; 
  
_diffrn_ambient_temperature       100(2) 
_diffrn_radiation_wavelength      0.71073 
_diffrn_radiation_type            MoK\a 
_diffrn_radiation_source          'fine-focus sealed tube' 
_diffrn_radiation_monochromator   graphite 
_diffrn_measurement_device_type   'Bruker APEX-II CCD' 
_diffrn_measurement_method        '\f and \w scans' 
_diffrn_reflns_number             6677 
_diffrn_reflns_av_R_equivalents   0.0399 
_diffrn_reflns_av_sigmaI/netI     0.0410 
_diffrn_reflns_limit_h_min        -11 
_diffrn_reflns_limit_h_max        11 
_diffrn_reflns_limit_k_min        -10 
_diffrn_reflns_limit_k_max        10 
_diffrn_reflns_limit_l_min        -11 
_diffrn_reflns_limit_l_max        13 
_diffrn_reflns_theta_min          4.07 
_diffrn_reflns_theta_max          25.07 
_reflns_number_total              1644 
_reflns_number_gt                 1228 
_reflns_threshold_expression      >2sigma(I) 
  
_computing_data_collection        'Bruker APEX2' 
_computing_cell_refinement        'Bruker SAINT' 
_computing_data_reduction         'Bruker SAINT' 
_computing_structure_solution     'SHELXS-97 (Sheldrick, 1990)' 
_computing_structure_refinement   'SHELXL-97 (Sheldrick, 1997)' 
_computing_molecular_graphics     'Bruker SHELXTL' 
_computing_publication_material   'Bruker SHELXTL' 
  
_refine_special_details 
; 
 Refinement of F^2^ against ALL reflections.  The weighted R-factor wR and 
 goodness of fit S are based on F^2^, conventional R-factors R are based 
 on F, with F set to zero for negative F^2^. The threshold expression of 
 F^2^ > 2sigma(F^2^) is used only for calculating R-factors(gt) etc. and is 
 not relevant to the choice of reflections for refinement.  R-factors based 
 on F^2^ are statistically about twice as large as those based on F, and R- 
 factors based on ALL data will be even larger. 
; 
  
_refine_ls_structure_factor_coef  Fsqd 
_refine_ls_matrix_type            full 
_refine_ls_weighting_scheme       calc 
_refine_ls_weighting_details 
 'calc w=1/[\s^2^(Fo^2^)+(0.0600P)^2^+0.5700P] where P=(Fo^2^+2Fc^2^)/3' 
_atom_sites_solution_primary      direct 
_atom_sites_solution_secondary    difmap 
_atom_sites_solution_hydrogens    geom 
_refine_ls_hydrogen_treatment     constr
_refine_ls_extinction_method      none 
_refine_ls_extinction_coef        ? 
_refine_ls_number_reflns          1644 
_refine_ls_number_parameters      136 
_refine_ls_number_restraints      0 
_refine_ls_R_factor_all           0.0597 
_refine_ls_R_factor_gt            0.0377 
_refine_ls_wR_factor_ref          0.1138 
_refine_ls_wR_factor_gt           0.1014 
_refine_ls_goodness_of_fit_ref    1.041 
_refine_ls_restrained_S_all       1.041 
_refine_ls_shift/su_max           0.005 
_refine_ls_shift/su_mean          0.001 
  
loop_ 
 _atom_site_label 
 _atom_site_type_symbol 
 _atom_site_fract_x 
 _atom_site_fract_y 
 _atom_site_fract_z 
 _atom_site_U_iso_or_equiv 
 _atom_site_adp_type 
 _atom_site_occupancy 
 _atom_site_symmetry_multiplicity 
 _atom_site_calc_flag 
 _atom_site_refinement_flags 
 _atom_site_disorder_assembly 
 _atom_site_disorder_group 
Cl1 Cl 0.01022(7) 0.05613(7) 0.20894(7) 0.0243(2) Uani 1 1 d . . . 
F1 F -0.0710(2) -0.6506(2) 0.39581(17) 0.0435(5) Uani 1 1 d . . . 
F2 F -0.21863(19) -0.6021(2) 0.21340(17) 0.0405(5) Uani 1 1 d . . . 
F3 F -0.15059(19) -0.4276(2) 0.34954(18) 0.0442(5) Uani 1 1 d . . . 
N1 N 0.3014(3) 0.2644(3) 0.4523(2) 0.0263(6) Uani 1 1 d . . . 
N2 N 0.3336(2) -0.1126(3) 0.4911(2) 0.0207(5) Uani 1 1 d . . . 
N3 N 0.0888(2) -0.2104(2) 0.2943(2) 0.0182(5) Uani 1 1 d . . . 
N4 N 0.1501(2) -0.4530(2) 0.3595(2) 0.0212(5) Uani 1 1 d . . . 
H4A H 0.2120 -0.5140 0.4114 0.025 Uiso 1 1 calc R . . 
C1 C 0.2748(3) 0.1403(3) 0.4339(2) 0.0211(6) Uani 1 1 d . . . 
C2 C 0.2413(3) -0.0158(3) 0.4111(2) 0.0189(6) Uani 1 1 d . . . 
C3 C 0.3031(3) -0.2541(3) 0.4727(2) 0.0208(6) Uani 1 1 d . . . 
H3A H 0.3664 -0.3244 0.5265 0.025 Uiso 1 1 calc R . . 
C4 C 0.1229(3) -0.0677(3) 0.3145(2) 0.0186(6) Uani 1 1 d . . . 
C5 C 0.1779(3) -0.3063(3) 0.3747(2) 0.0179(6) Uani 1 1 d . . . 
C6 C 0.0259(3) -0.5172(3) 0.2643(2) 0.0201(6) Uani 1 1 d . . . 
H6A H 0.0583 -0.6110 0.2363 0.024 Uiso 1 1 calc R . . 
H6B H -0.0059 -0.4482 0.1940 0.024 Uiso 1 1 calc R . . 
C7 C -0.1040(3) -0.5485(3) 0.3057(3) 0.0288(7) Uani 1 1 d . . . 
  
loop_ 
 _atom_site_aniso_label 
 _atom_site_aniso_U_11 
 _atom_site_aniso_U_22 
 _atom_site_aniso_U_33 
 _atom_site_aniso_U_23 
 _atom_site_aniso_U_13 
 _atom_site_aniso_U_12 
Cl1 0.0239(4) 0.0133(4) 0.0263(4) 0.0032(3) -0.0041(3) 0.0015(3) 
F1 0.0564(12) 0.0427(13) 0.0340(11) 0.0040(9) 0.0185(10) -0.0151(10) 
F2 0.0303(9) 0.0469(12) 0.0385(11) -0.0159(9) 0.0041(9) -0.0159(8) 
F3 0.0303(10) 0.0472(13) 0.0564(13) -0.0264(10) 0.0163(10) -0.0046(8) 
N1 0.0271(13) 0.0174(14) 0.0271(14) 0.0010(11) -0.0005(12) 0.0005(11) 
N2 0.0227(12) 0.0153(12) 0.0194(12) 0.0006(10) 0.0010(11) 0.0012(10) 
N3 0.0202(12) 0.0111(12) 0.0198(13) 0.0003(9) 0.0023(10) 0.0014(9) 
N4 0.0247(12) 0.0112(12) 0.0217(13) 0.0020(9) -0.0001(10) 0.0011(9) 
C1 0.0199(14) 0.0200(17) 0.0180(15) 0.0013(12) -0.0009(12) 0.0023(11) 
C2 0.0214(14) 0.0140(14) 0.0201(15) 0.0005(11) 0.0052(12) -0.0007(11) 
C3 0.0242(14) 0.0143(15) 0.0180(15) 0.0035(11) -0.0006(13) 0.0045(11) 
C4 0.0185(13) 0.0159(15) 0.0184(15) 0.0040(11) 0.0022(12) 0.0024(11) 
C5 0.0188(13) 0.0136(15) 0.0193(14) -0.0002(11) 0.0037(12) 0.0002(11) 
C6 0.0262(15) 0.0124(14) 0.0168(14) -0.0007(11) 0.0008(12) -0.0001(11) 
C7 0.0319(16) 0.0234(17) 0.0272(17) -0.0058(14) 0.0046(14) -0.0034(13) 
  
_geom_special_details 
; 
 All esds (except the esd in the dihedral angle between two l.s. planes) 
 are estimated using the full covariance matrix.  The cell esds are taken 
 into account individually in the estimation of esds in distances, angles 
 and torsion angles; correlations between esds in cell parameters are only 
 used when they are defined by crystal symmetry.  An approximate (isotropic) 
 treatment of cell esds is used for estimating esds involving l.s. planes. 
; 
  
loop_ 
 _geom_bond_atom_site_label_1 
 _geom_bond_atom_site_label_2 
 _geom_bond_distance 
 _geom_bond_site_symmetry_2 
 _geom_bond_publ_flag 
Cl1 C4 1.737(3) . ? 
F1 C7 1.348(4) . ? 
F2 C7 1.338(3) . ? 
F3 C7 1.339(3) . ? 
N1 C1 1.149(3) . ? 
N2 C3 1.308(3) . ? 
N2 C2 1.359(4) . ? 
N3 C4 1.326(3) . ? 
N3 C5 1.344(3) . ? 
N4 C5 1.346(3) . ? 
N4 C6 1.443(3) . ? 
N4 H4A 0.8800 . ? 
C1 C2 1.445(4) . ? 
C2 C4 1.379(4) . ? 
C3 C5 1.425(4) . ? 
C3 H3A 0.9500 . ? 
C6 C7 1.498(4) . ? 
C6 H6A 0.9900 . ? 
C6 H6B 0.9900 . ? 
  
loop_ 
 _geom_angle_atom_site_label_1 
 _geom_angle_atom_site_label_2 
 _geom_angle_atom_site_label_3 
 _geom_angle 
 _geom_angle_site_symmetry_1 
 _geom_angle_site_symmetry_3 
 _geom_angle_publ_flag 
C3 N2 C2 117.0(2) . . ? 
C4 N3 C5 116.0(2) . . ? 
C5 N4 C6 124.6(2) . . ? 
C5 N4 H4A 117.7 . . ? 
C6 N4 H4A 117.7 . . ? 
N1 C1 C2 179.8(3) . . ? 
N2 C2 C4 120.4(2) . . ? 
N2 C2 C1 116.4(2) . . ? 
C4 C2 C1 123.3(2) . . ? 
N2 C3 C5 122.2(2) . . ? 
N2 C3 H3A 118.9 . . ? 
C5 C3 H3A 118.9 . . ? 
N3 C4 C2 123.8(2) . . ? 
N3 C4 Cl1 116.0(2) . . ? 
C2 C4 Cl1 120.1(2) . . ? 
N3 C5 N4 119.2(2) . . ? 
N3 C5 C3 120.6(2) . . ? 
N4 C5 C3 120.2(2) . . ? 
N4 C6 C7 112.5(2) . . ? 
N4 C6 H6A 109.1 . . ? 
C7 C6 H6A 109.1 . . ? 
N4 C6 H6B 109.1 . . ? 
C7 C6 H6B 109.1 . . ? 
H6A C6 H6B 107.8 . . ? 
F3 C7 F2 108.2(2) . . ? 
F3 C7 F1 106.2(2) . . ? 
F2 C7 F1 107.0(2) . . ? 
F3 C7 C6 112.6(2) . . ? 
F2 C7 C6 110.5(2) . . ? 
F1 C7 C6 112.0(2) . . ? 
  
_diffrn_measured_fraction_theta_max    0.983 
_diffrn_reflns_theta_full              25.00 
_diffrn_measured_fraction_theta_full   0.985 
_refine_diff_density_max    0.414 
_refine_diff_density_min   -0.305 
_refine_diff_density_rms    0.070 

#===END

 
data_dichloropyrazine_carbonitrile
  
_audit_creation_method            SHELXL-2012 
_chemical_name_systematic 
; 
 ? 
; 
_chemical_name_common             ? 
_chemical_melting_point           ? 
_chemical_formula_moiety          
 'C5 H Cl2 N3'  
_chemical_formula_sum 
 'C5 H Cl2 N3' 
_chemical_formula_weight          173.99 
  
loop_ 
 _atom_type_symbol 
 _atom_type_description 
 _atom_type_scat_dispersion_real 
 _atom_type_scat_dispersion_imag 
 _atom_type_scat_source 
 'C'  'C'   0.0033   0.0016 
 'International Tables Vol C Tables 4.2.6.8 and 6.1.1.4' 
 'H'  'H'   0.0000   0.0000 
 'International Tables Vol C Tables 4.2.6.8 and 6.1.1.4' 
 'Cl'  'Cl'   0.1484   0.1585 
 'International Tables Vol C Tables 4.2.6.8 and 6.1.1.4' 
 'N'  'N'   0.0061   0.0033 
 'International Tables Vol C Tables 4.2.6.8 and 6.1.1.4' 
  
_space_group_crystal_system       monoclinic 
_space_group_IT_number            14 
_space_group_name_H-M_alt         'P 21/n' 
_space_group_name_Hall            '-P 2yn' 
  
_shelx_space_group_comment 
; 
The symmetry employed for this shelxl refinement is uniquely defined 
by the following loop, which should always be used as a source of 
symmetry information in preference to the above space-group names. 
They are only intended as comments. 
; 
  
loop_ 
 _space_group_symop_operation_xyz 
 'x, y, z' 
 '-x+1/2, y+1/2, -z+1/2' 
 '-x, -y, -z' 
 'x-1/2, -y-1/2, z-1/2' 
  
_cell_length_a                    10.9565(10) 
_cell_length_b                    5.7167(6) 
_cell_length_c                    16.5950(15) 
_cell_angle_alpha                 90 
_cell_angle_beta                  108.605(3) 
_cell_angle_gamma                 90 
_cell_volume                      985.11(16) 
_cell_formula_units_Z             6 
_cell_measurement_temperature     100(2) 
_cell_measurement_reflns_used     2219 
_cell_measurement_theta_min       3.75 
_cell_measurement_theta_max       26.32 
  
_exptl_crystal_description        Plate 
_exptl_crystal_colour             Colorless 
_exptl_crystal_density_meas       'not measured' 
_exptl_crystal_density_method     ? 
_exptl_crystal_density_diffrn     1.760 
_exptl_crystal_F_000              516 
_exptl_transmission_factor_min    ? 
_exptl_transmission_factor_max    ? 
_exptl_crystal_size_max           0.150 
_exptl_crystal_size_mid           0.120 
_exptl_crystal_size_min           0.030 
_exptl_absorpt_coefficient_mu     0.897 
_shelx_estimated_absorpt_T_min    0.877 
_shelx_estimated_absorpt_T_max    0.974 
_exptl_absorpt_correction_type    multi-scan 
_exptl_absorpt_correction_T_min   0.6398 
_exptl_absorpt_correction_T_max   0.7454 
_exptl_absorpt_process_details    SADABS 
  
_exptl_special_details 
; 
 ? 
; 
  
_diffrn_ambient_temperature       100(2) 
_diffrn_radiation_wavelength      0.71073 
_diffrn_radiation_type            MoK\a 
_diffrn_source                    'micro-focus sealed tube' 
_diffrn_measurement_device_type   'Bruker Photon 100 CMOS CCD' 
_diffrn_measurement_method        '\f and \w scans' 
_diffrn_detector_area_resol_mean  '1024 x 1024' 
_diffrn_reflns_number             6211 
_diffrn_reflns_av_unetI/netI      0.0401 
_diffrn_reflns_av_R_equivalents   0.0394 
_diffrn_reflns_limit_h_min        -13 
_diffrn_reflns_limit_h_max        13 
_diffrn_reflns_limit_k_min        -6 
_diffrn_reflns_limit_k_max        7 
_diffrn_reflns_limit_l_min        -20 
_diffrn_reflns_limit_l_max        20 
_diffrn_reflns_theta_min          2.590 
_diffrn_reflns_theta_max          26.350 
_diffrn_reflns_theta_full         25.000 
_diffrn_measured_fraction_theta_max   0.998 
_diffrn_measured_fraction_theta_full  0.997 
_diffrn_reflns_Laue_measured_fraction_max    0.998 
_diffrn_reflns_Laue_measured_fraction_full   0.997 
_diffrn_reflns_point_group_measured_fraction_max   0.998 
_diffrn_reflns_point_group_measured_fraction_full  0.997 
_reflns_number_total              2007 
_reflns_number_gt                 1556 
_reflns_threshold_expression      'I > 2\s(I)' 
_reflns_Friedel_coverage          0.000 
_reflns_Friedel_fraction_max      . 
_reflns_Friedel_fraction_full     . 
  
_reflns_special_details 
; 
 Reflections were merged by SHELXL according to the crystal 
 class for the calculation of statistics and refinement. 
  
 _reflns_Friedel_fraction is defined as the number of unique 
 Friedel pairs measured divided by the number that would be 
 possible theoretically, ignoring centric projections and 
 systematic absences. 
; 
  
_computing_data_collection        'Bruker APEX2' 
_computing_cell_refinement        'Bruker SAINT' 
_computing_data_reduction         'Bruker SAINT' 
_computing_structure_solution     'SHELXS-97 (Sheldrick, 2008)' 
_computing_structure_refinement   'SHELXL-2012 (Sheldrick, 2012)' 
_computing_molecular_graphics     'Bruker SHELXTL' 
_computing_publication_material   'Bruker SHELXTL' 
  
_refine_special_details 
; 
 ? 
; 
_refine_ls_structure_factor_coef  Fsqd 
_refine_ls_matrix_type            full 
_refine_ls_weighting_scheme       calc 
_refine_ls_weighting_details 
; 
 w=1/[\s^2^(Fo^2^)+(0.0345P)^2^+0.5977P] 
 where P=(Fo^2^+2Fc^2^)/3 
; 
_atom_sites_solution_primary      direct 
_atom_sites_solution_secondary    difmap 
_atom_sites_solution_hydrogens    geom 
_refine_ls_hydrogen_treatment     constr 
_refine_ls_extinction_method      none 
_refine_ls_extinction_coef        . 
_refine_ls_number_reflns          2007 
_refine_ls_number_parameters      181 
_refine_ls_number_restraints      0 
_refine_ls_R_factor_all           0.0585 
_refine_ls_R_factor_gt            0.0390 
_refine_ls_wR_factor_ref          0.0875 
_refine_ls_wR_factor_gt           0.0801 
_refine_ls_goodness_of_fit_ref    1.051 
_refine_ls_restrained_S_all       1.051 
_refine_ls_shift/su_max           0.002 
_refine_ls_shift/su_mean          0.000 
  
loop_ 
 _atom_site_label 
 _atom_site_type_symbol 
 _atom_site_fract_x 
 _atom_site_fract_y 
 _atom_site_fract_z 
 _atom_site_U_iso_or_equiv 
 _atom_site_adp_type 
 _atom_site_occupancy 
 _atom_site_site_symmetry_order 
 _atom_site_calc_flag 
 _atom_site_refinement_flags_posn 
 _atom_site_refinement_flags_adp 
 _atom_site_refinement_flags_occupancy 
 _atom_site_disorder_assembly 
 _atom_site_disorder_group 
Cl1 Cl 0.99887(6) 0.33385(11) 1.24216(3) 0.02783(18) Uani 1 1 d . . . . . 
Cl2 Cl 0.64844(6) 0.15599(14) 0.95449(3) 0.0381(2) Uani 1 1 d . . . . . 
N1 N 0.82297(17) 0.2156(3) 1.10124(11) 0.0194(4) Uani 1 1 d . . . . . 
N2 N 0.76016(17) -0.2009(4) 1.16814(11) 0.0208(4) Uani 1 1 d . . . . . 
N3 N 0.96390(19) -0.1618(4) 1.37329(12) 0.0259(5) Uani 1 1 d . . . . . 
C1 C 0.8811(2) 0.1514(4) 1.18088(13) 0.0177(5) Uani 1 1 d . . . . . 
C2 C 0.8499(2) -0.0532(4) 1.21515(13) 0.0172(5) Uani 1 1 d . . . . . 
C3 C 0.9131(2) -0.1149(4) 1.30340(14) 0.0195(5) Uani 1 1 d . . . . . 
C4 C 0.7323(2) 0.0708(5) 1.05659(13) 0.0218(5) Uani 1 1 d . . . . . 
C5 C 0.7014(2) -0.1387(4) 1.08791(14) 0.0220(5) Uani 1 1 d . . . . . 
H5 H 0.6378 -0.2382 1.0517 0.026 Uiso 1 1 calc R U . . . 
Cl1' Cl 0.77840(12) 0.6763(2) 0.90367(7) 0.0262(3) Uani 0.5 1 d . . P A -1 
Cl2' Cl 1.1560(2) 0.7851(4) 1.18509(18) 0.0259(5) Uani 0.5 1 d . . P A -1 
N1' N 0.9746(7) 0.7042(10) 1.0425(4) 0.0185(11) Uani 0.5 1 d . . P A -1 
N2' N 1.0829(5) 0.2852(11) 1.0122(4) 0.0251(11) Uani 0.5 1 d . . P A -1 
N3' N 0.8693(10) 0.1346(14) 0.8195(7) 0.037(2) Uani 0.5 1 d . . P A -1 
C1' C 0.9197(5) 0.5780(12) 0.9735(4) 0.0170(10) Uani 0.5 1 d . . P A -1 
C2' C 0.9728(8) 0.3694(11) 0.9573(5) 0.0198(13) Uani 0.5 1 d . . P A -1 
C3' C 0.9148(5) 0.2358(12) 0.8804(4) 0.0222(11) Uani 0.5 1 d . . P A -1 
C4' C 1.0824(6) 0.6220(11) 1.0957(5) 0.0212(12) Uani 0.5 1 d . . P A -1 
C5' C 1.1376(5) 0.4111(9) 1.0812(4) 0.0231(11) Uani 0.5 1 d . . P A -1 
H5' H 1.2154 0.3580 1.1215 0.028 Uiso 0.5 1 calc R U P A -1 
  
loop_ 
 _atom_site_aniso_label 
 _atom_site_aniso_U_11 
 _atom_site_aniso_U_22 
 _atom_site_aniso_U_33 
 _atom_site_aniso_U_23 
 _atom_site_aniso_U_13 
 _atom_site_aniso_U_12 
Cl1 0.0344(3) 0.0218(3) 0.0236(3) -0.0022(2) 0.0041(3) -0.0111(3) 
Cl2 0.0312(3) 0.0650(5) 0.0164(3) 0.0065(3) 0.0052(2) -0.0161(3) 
N1 0.0200(10) 0.0223(11) 0.0181(9) -0.0020(8) 0.0094(8) 0.0005(8) 
N2 0.0205(10) 0.0224(12) 0.0225(10) -0.0039(8) 0.0110(8) -0.0039(8) 
N3 0.0251(11) 0.0249(12) 0.0272(11) 0.0033(9) 0.0076(9) 0.0010(9) 
C1 0.0175(11) 0.0166(12) 0.0212(11) -0.0050(9) 0.0092(9) 0.0017(9) 
C2 0.0154(11) 0.0181(13) 0.0205(11) -0.0020(9) 0.0091(9) 0.0017(9) 
C3 0.0176(11) 0.0151(13) 0.0272(13) -0.0020(10) 0.0091(10) -0.0003(9) 
C4 0.0195(11) 0.0319(15) 0.0173(10) -0.0032(10) 0.0103(9) -0.0012(10) 
C5 0.0195(11) 0.0289(15) 0.0209(11) -0.0065(10) 0.0111(9) -0.0066(10) 
Cl1' 0.0272(7) 0.0227(7) 0.0265(6) 0.0014(5) 0.0054(5) 0.0074(6) 
Cl2' 0.0237(9) 0.0314(13) 0.0242(8) -0.0021(10) 0.0099(7) -0.0075(9) 
N1' 0.025(3) 0.018(3) 0.020(3) 0.003(2) 0.017(3) -0.002(2) 
N2' 0.029(3) 0.022(3) 0.030(3) 0.003(3) 0.017(3) 0.003(2) 
N3' 0.049(5) 0.029(5) 0.039(4) -0.005(4) 0.023(4) 0.004(3) 
C1' 0.018(3) 0.016(3) 0.019(3) 0.006(3) 0.010(3) 0.001(2) 
C2' 0.021(3) 0.017(3) 0.028(4) -0.001(3) 0.018(3) 0.001(3) 
C3' 0.026(3) 0.017(3) 0.029(3) 0.000(3) 0.017(3) 0.000(2) 
C4' 0.021(3) 0.029(4) 0.016(3) 0.002(3) 0.008(2) -0.008(2) 
C5' 0.016(3) 0.021(3) 0.032(3) 0.011(2) 0.007(2) 0.007(2) 
  
_geom_special_details 
; 
 All esds (except the esd in the dihedral angle between two l.s. planes) 
 are estimated using the full covariance matrix.  The cell esds are taken 
 into account individually in the estimation of esds in distances, angles 
 and torsion angles; correlations between esds in cell parameters are only 
 used when they are defined by crystal symmetry.  An approximate (isotropic) 
 treatment of cell esds is used for estimating esds involving l.s. planes. 
; 
  
loop_ 
 _geom_bond_atom_site_label_1 
 _geom_bond_atom_site_label_2 
 _geom_bond_distance 
 _geom_bond_site_symmetry_2 
 _geom_bond_publ_flag 
Cl1 C1 1.718(2) . ? 
Cl2 C4 1.720(2) . ? 
N1 C1 1.323(3) . ? 
N1 C4 1.323(3) . ? 
N2 C5 1.329(3) . ? 
N2 C2 1.341(3) . ? 
N3 C3 1.147(3) . ? 
C1 C2 1.390(3) . ? 
C2 C3 1.450(3) . ? 
C4 C5 1.390(3) . ? 
C5 H5 0.9500 . ? 
Cl1' C1' 1.705(6) . ? 
Cl2' C4' 1.720(9) . ? 
N1' C4' 1.315(8) . ? 
N1' C1' 1.325(9) . ? 
N2' C5' 1.322(8) . ? 
N2' C2' 1.347(10) . ? 
N3' C3' 1.132(11) . ? 
C1' C2' 1.390(8) . ? 
C2' C3' 1.450(9) . ? 
C4' C5' 1.404(8) . ? 
C5' H5' 0.9500 . ? 
  
loop_ 
 _geom_angle_atom_site_label_1 
 _geom_angle_atom_site_label_2 
 _geom_angle_atom_site_label_3 
 _geom_angle 
 _geom_angle_site_symmetry_1 
 _geom_angle_site_symmetry_3 
 _geom_angle_publ_flag 
C1 N1 C4 115.0(2) . . ? 
C5 N2 C2 116.4(2) . . ? 
N1 C1 C2 122.6(2) . . ? 
N1 C1 Cl1 117.03(18) . . ? 
C2 C1 Cl1 120.33(16) . . ? 
N2 C2 C1 121.47(19) . . ? 
N2 C2 C3 117.4(2) . . ? 
C1 C2 C3 121.2(2) . . ? 
N3 C3 C2 179.3(3) . . ? 
N1 C4 C5 124.0(2) . . ? 
N1 C4 Cl2 116.37(19) . . ? 
C5 C4 Cl2 119.67(18) . . ? 
N2 C5 C4 120.5(2) . . ? 
N2 C5 H5 119.8 . . ? 
C4 C5 H5 119.8 . . ? 
C4' N1' C1' 116.7(7) . . ? 
C5' N2' C2' 116.8(6) . . ? 
N1' C1' C2' 122.1(6) . . ? 
N1' C1' Cl1' 118.1(6) . . ? 
C2' C1' Cl1' 119.8(7) . . ? 
N2' C2' C1' 121.1(6) . . ? 
N2' C2' C3' 117.0(7) . . ? 
C1' C2' C3' 121.9(9) . . ? 
N3' C3' C2' 178.9(8) . . ? 
N1' C4' C5' 122.4(8) . . ? 
N1' C4' Cl2' 117.3(5) . . ? 
C5' C4' Cl2' 120.3(6) . . ? 
N2' C5' C4' 121.0(7) . . ? 
N2' C5' H5' 119.5 . . ? 
C4' C5' H5' 119.5 . . ? 
  
_refine_diff_density_max    0.341 
_refine_diff_density_min   -0.590 
_refine_diff_density_rms    0.069 
  
#===END
